# Supplementary material for: Phenolic Constituents of Lamium album L. subsp. album Flowers: Anatomical, Histochemical, and Phytochemical Study
Source: PubMed Central journal article supplement (PMC7766379; doi:10.3390/molecules25246025), 2020-12-19
Supplement: molecules-25-06025-s001.pdf [file molecules-25-06025-s001.pdf]

**Table S1. Names of standards with CAS number, producer and product number.**

| No | Name of standard                  | Producer                                      | Product number | CAS number  |
|----|-----------------------------------|-----------------------------------------------|----------------|-------------|
| 1  | acacetin                          | Sigma (USA)                                   | 49975          | 480-44-4    |
| 2  | apigenin                          | Sigma (USA)                                   | SMB00702       | 520-36-5    |
| 3  | apigenin 7-glucoside              | Supelco (USA)                                 | 44692          | 578-74-5    |
| 4  | astragalin                        | Supelco (USA)                                 | 68437          | 480-10-4    |
| 5  | hesperetin                        | Supelco (USA)                                 | H4125          | 69097-99-0  |
| 6  | hesperidin                        | Sigma (USA)                                   | H5254          | 520-26-3    |
| 7  | hyperoside                        | Sigma (USA)                                   | 00180585       | 482-36-0    |
| 8  | isoquercitrin                     | Sigma (USA)                                   | 00140585       | 482-35-9    |
| 9  | isoorientin                       | Supelco (USA)                                 | 78109          | 4261-42-1   |
| 10 | kaempferol                        | Supelco (USA)                                 | 96353          | 520-18-3    |
| 11 | quercetin                         | Sigma (USA)                                   | Q4951          | 117-39-5    |
| 12 | isorhamnetin                      | Sigma (USA)                                   | 17794          | 480-19-3    |
| 13 | luteolin                          | Sigma (USA)                                   | L9283          | 491-70-3    |
| 14 | narcissin                         | Sigma (USA)                                   | PHL83337       | 604-80-8    |
| 15 | naringin                          | Sigma (USA)                                   | N1376          | 10236-47-2  |
| 16 | naringenin                        | Sigma (USA)                                   | N5893          | 67604-48-2  |
| 17 | isorhamnetin 3-gluco-7-rhamnoside | National Medicines Institute (Warsaw, Poland) |                |             |
| 18 | rhoifolin                         | CarlRoth (Karlsruhe, Germany)                 | 7420.2         | 17306-46-6  |
| 19 | rutin                             | Sigma (USA)                                   | R5143          | 207671-50-9 |
| 20 | myricetin                         | Sigma (USA)                                   | M6760          | 529-44-2    |
| 21 | avicularin                        | Supelco (USA)                                 | 44006          | 572-30-5    |
| 22 | isorhamnetin 3-glucoside          | CarlRoth (Karlsruhe, Germany)                 | 9386.2         | 5041-82-7   |
| 23 | luteolin 7-glucoside              | Supelco (USA)                                 | 49968          | 5373-11-5   |

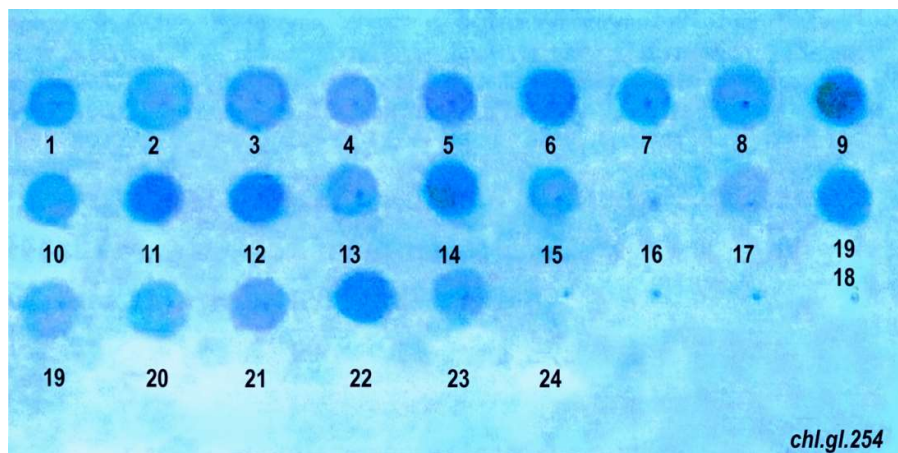

**Figure S1. Flavonoid standards after visualization with aluminum chloride in VIS light.**

Names of standards: 1 - acacetin, 2 - apigenin, 3 - apigenin 7-glucoside, 4 - astragalín, 5 - hesperetin, 6 - hesperidin, 7 - hiperoside, 8 - isoquercitrin, 9 - isoorientin, 10 - kaempferol, 11 - quercetin, 12 - isorhamnetin, 13 - luteolin, 14 - narcissin, 15 - naringin, 16 - naringenin, 17 - isorhamnetin 3-gluco-7-rhamnoside, 18 - rhoifolin, 19 - rutin, 20 - myricetin, 21 - avicularin, 22 - isorhamnetin 3-glucoside, 23 -luteolin 7-glucoside.
